# Supplementary material for: NEXN regulates vascular smooth muscle cell phenotypic switching and neointimal hyperplasia
Source: JCI journal article supplement (doi:10.1172/jci.insight.190089), 2025-05-29

Full unedited gel for Figure 2A

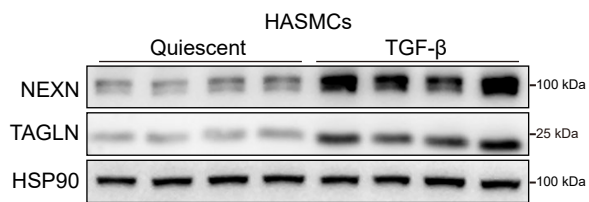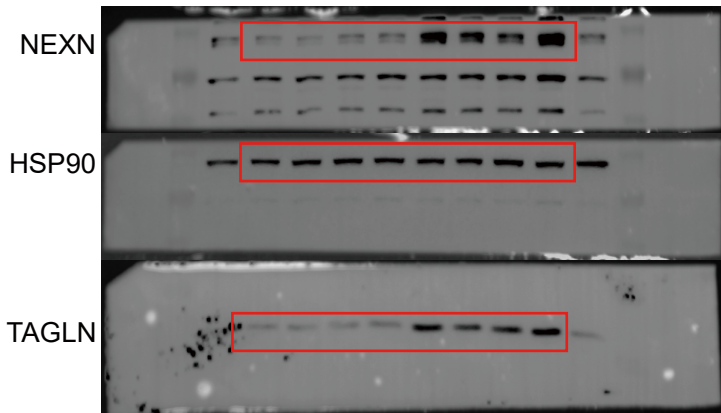

Full unedited gel for Figure 2B

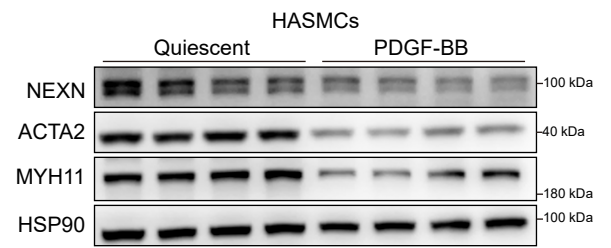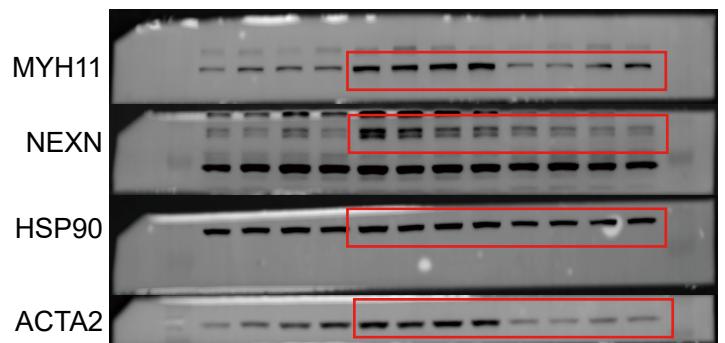

Full unedited gel for Figure 2C

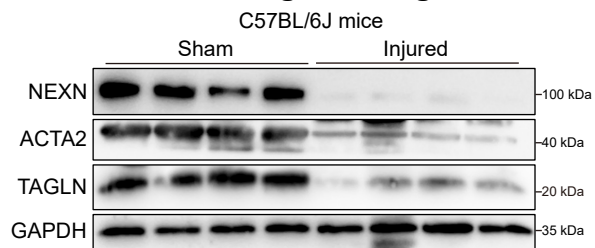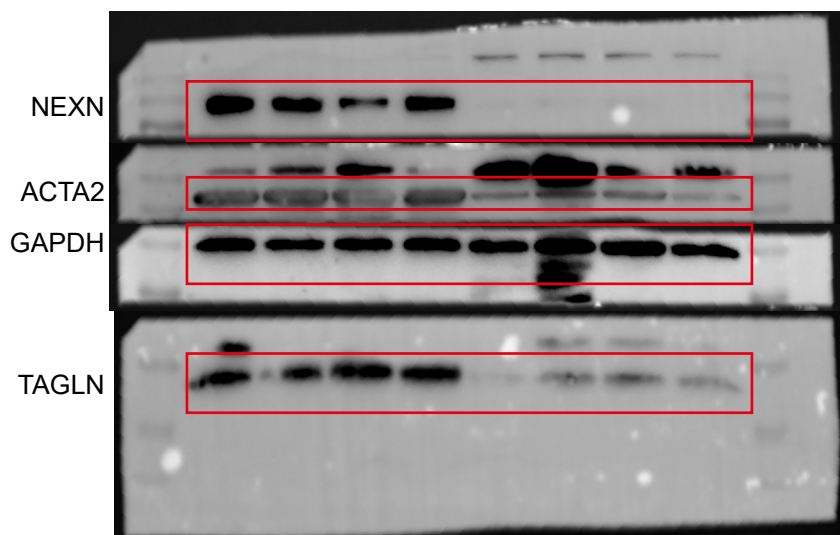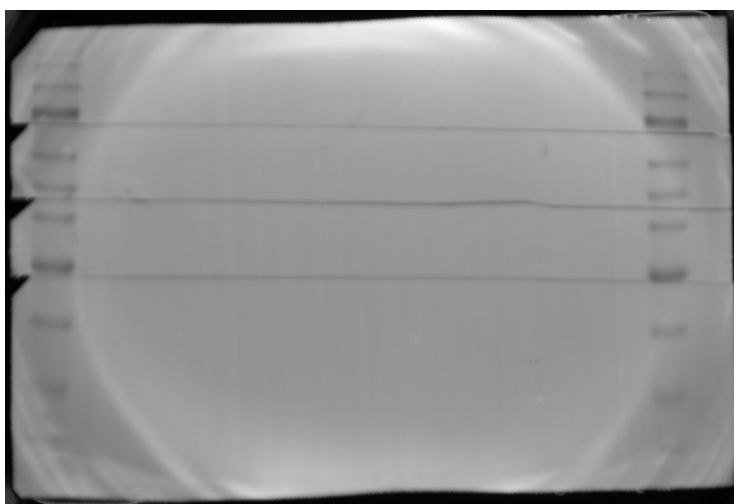

### Full unedited gel for Figure 3A

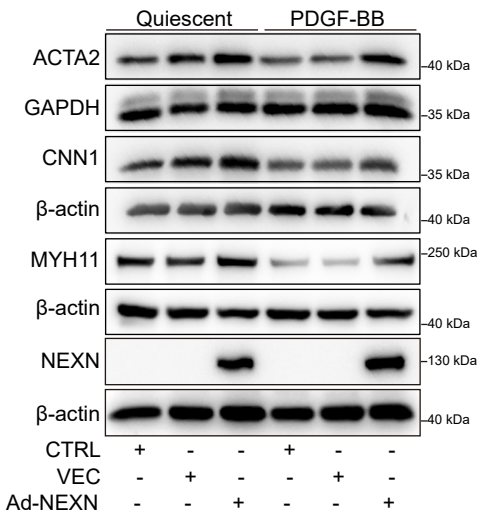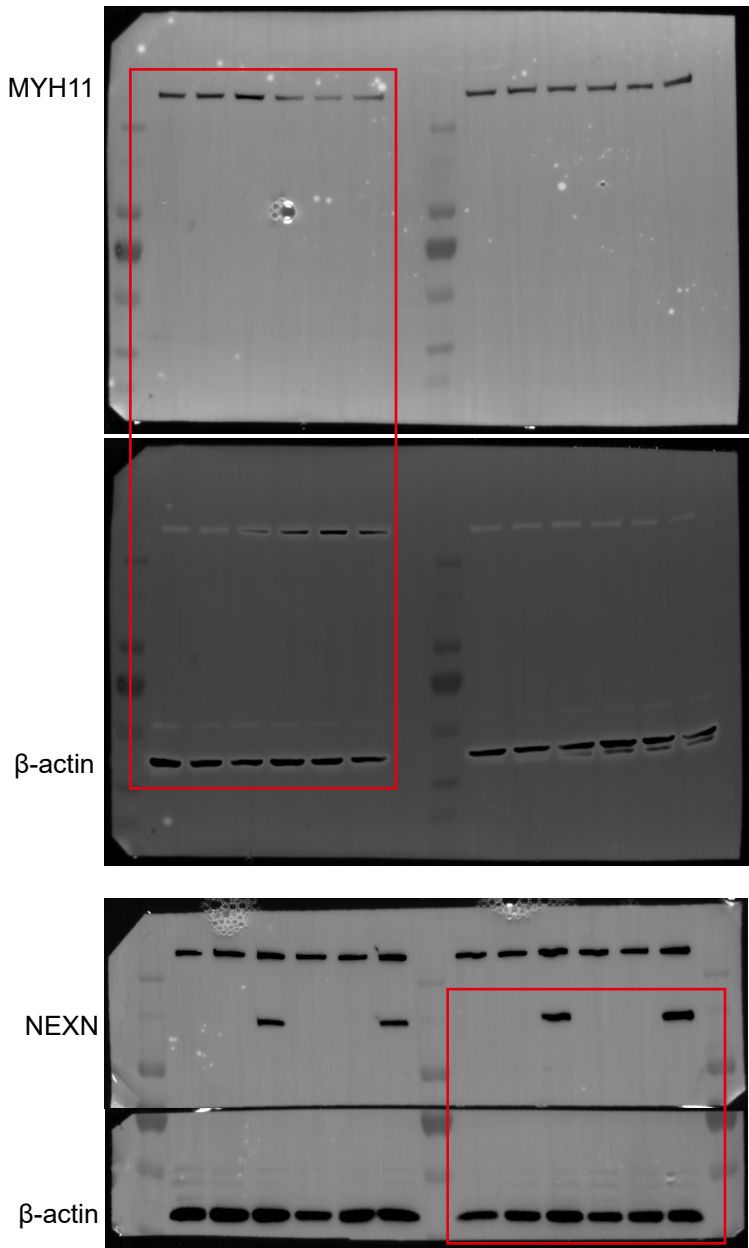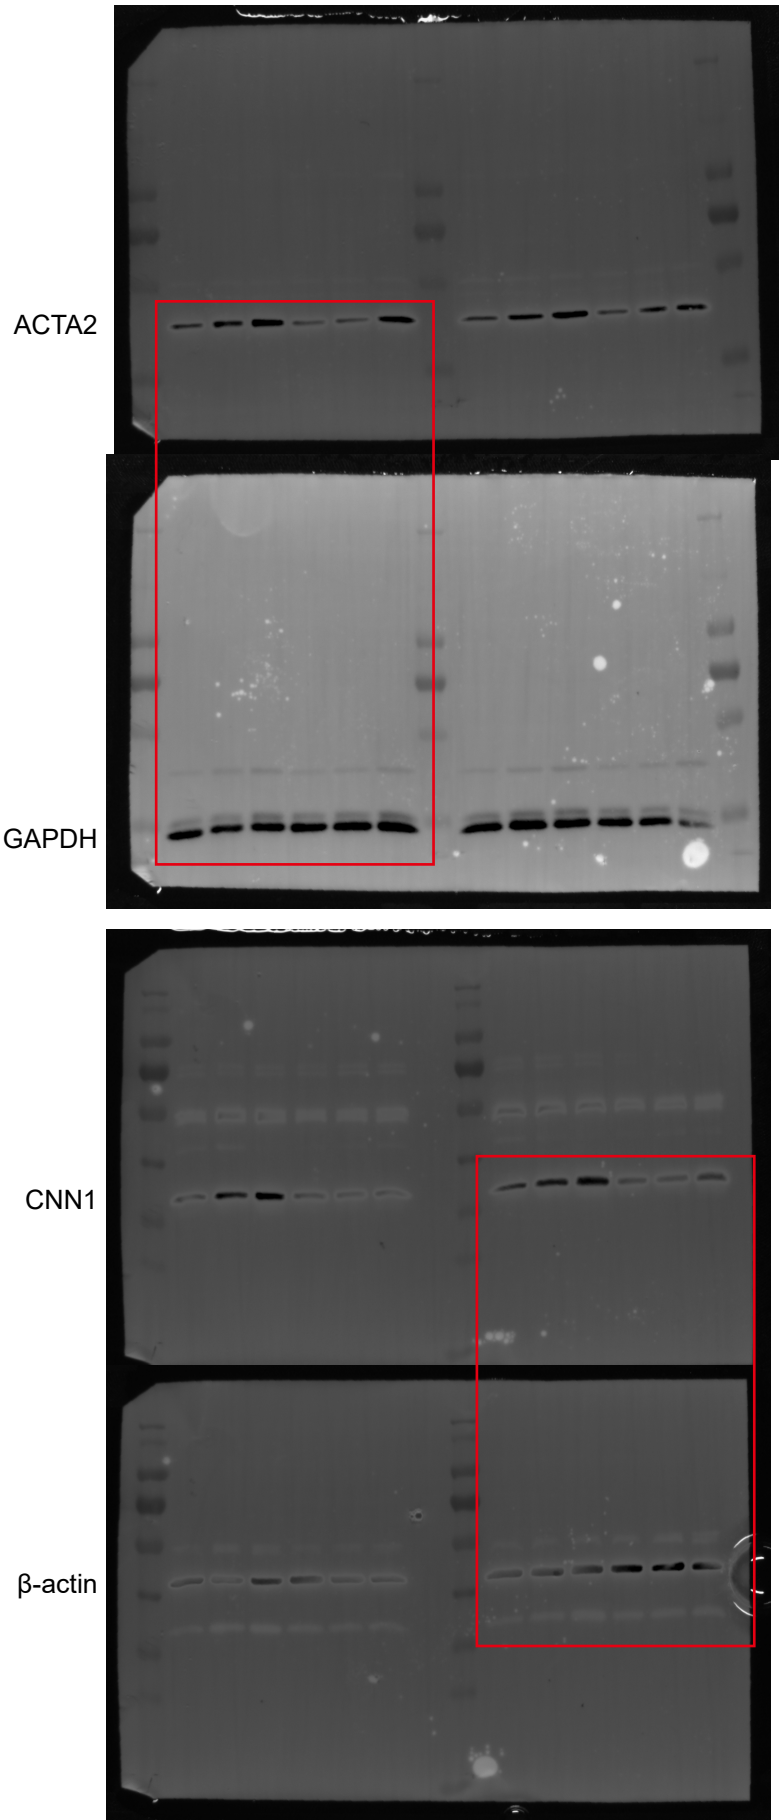

# Full unedited gel for Figure 4A

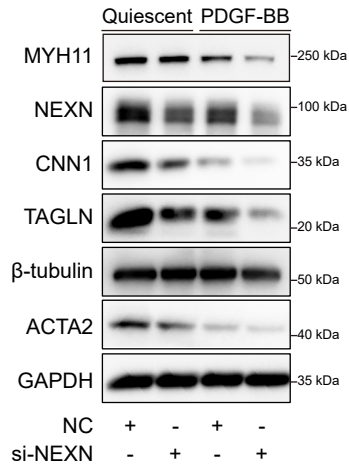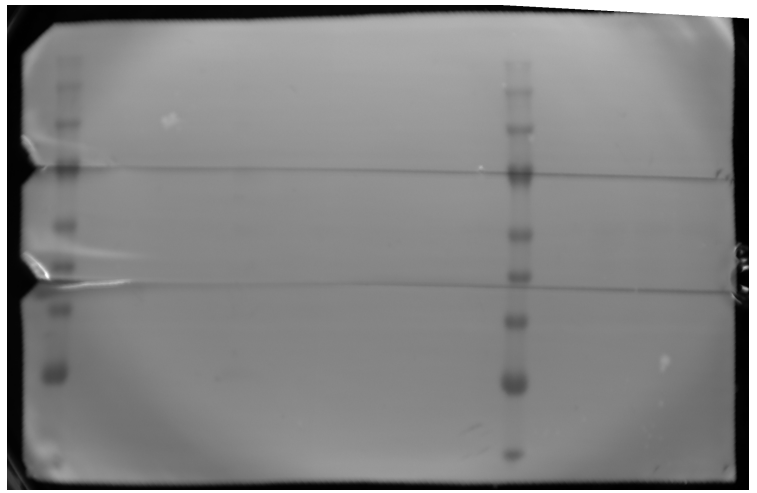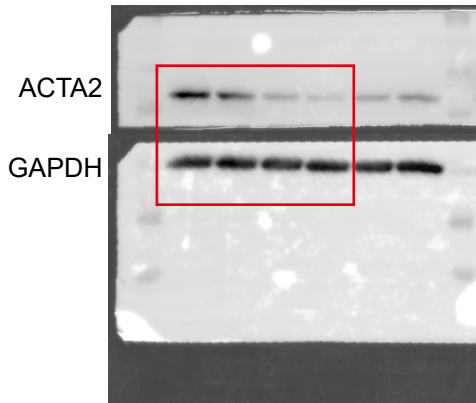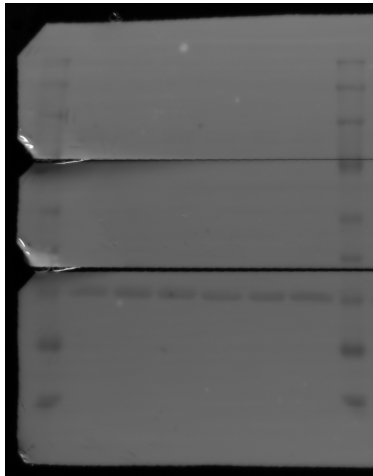

MYH11

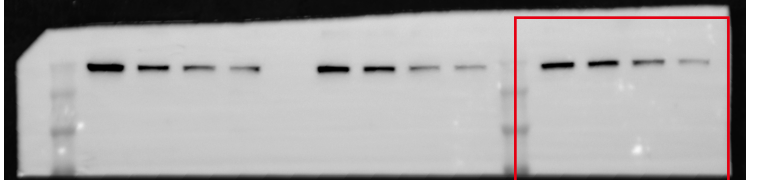

NEXN

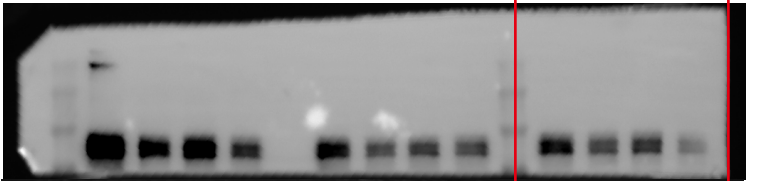

$\beta$ -tubulin

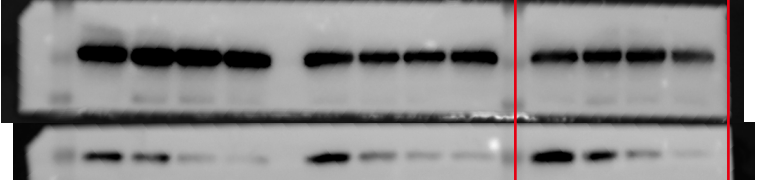

CNN1

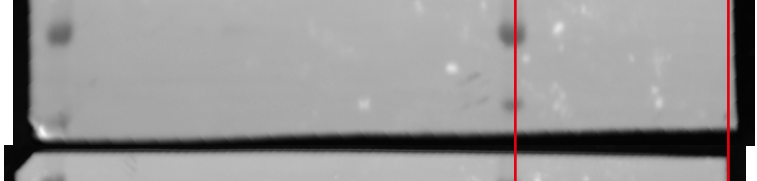

TAGLN

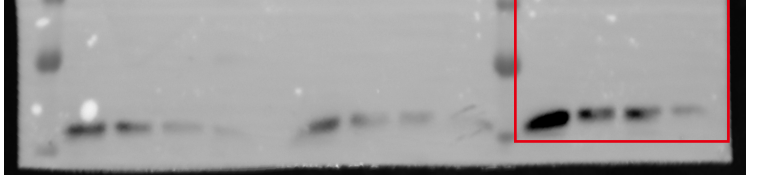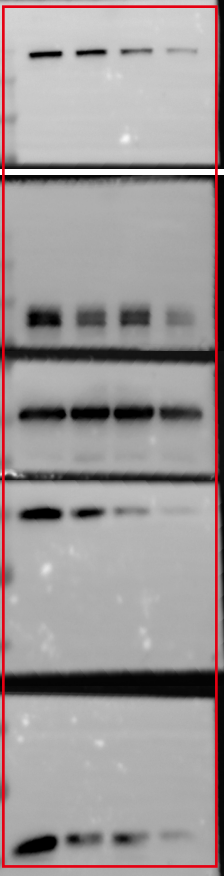

# Full unedited gel for Figure 5B

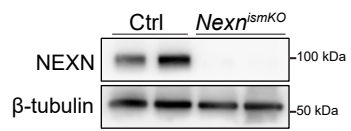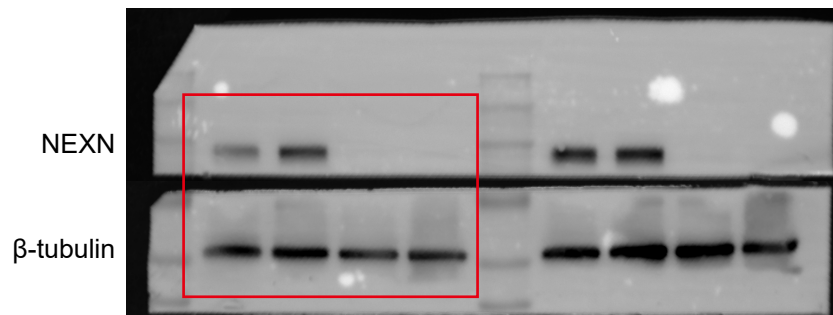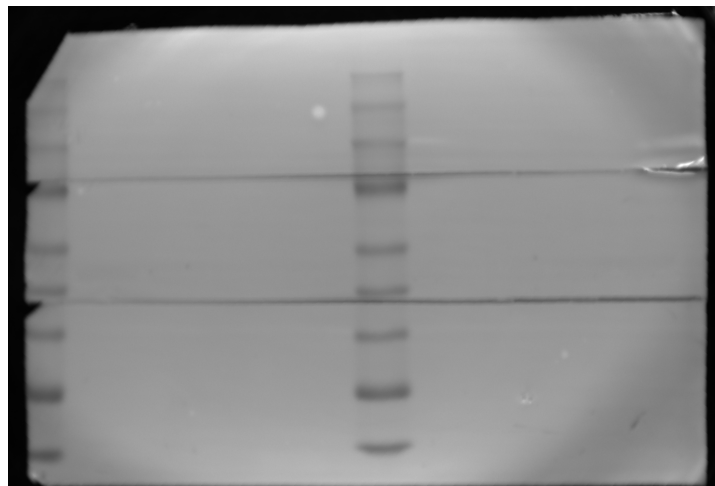

### Full unedited gel for Figure 6E

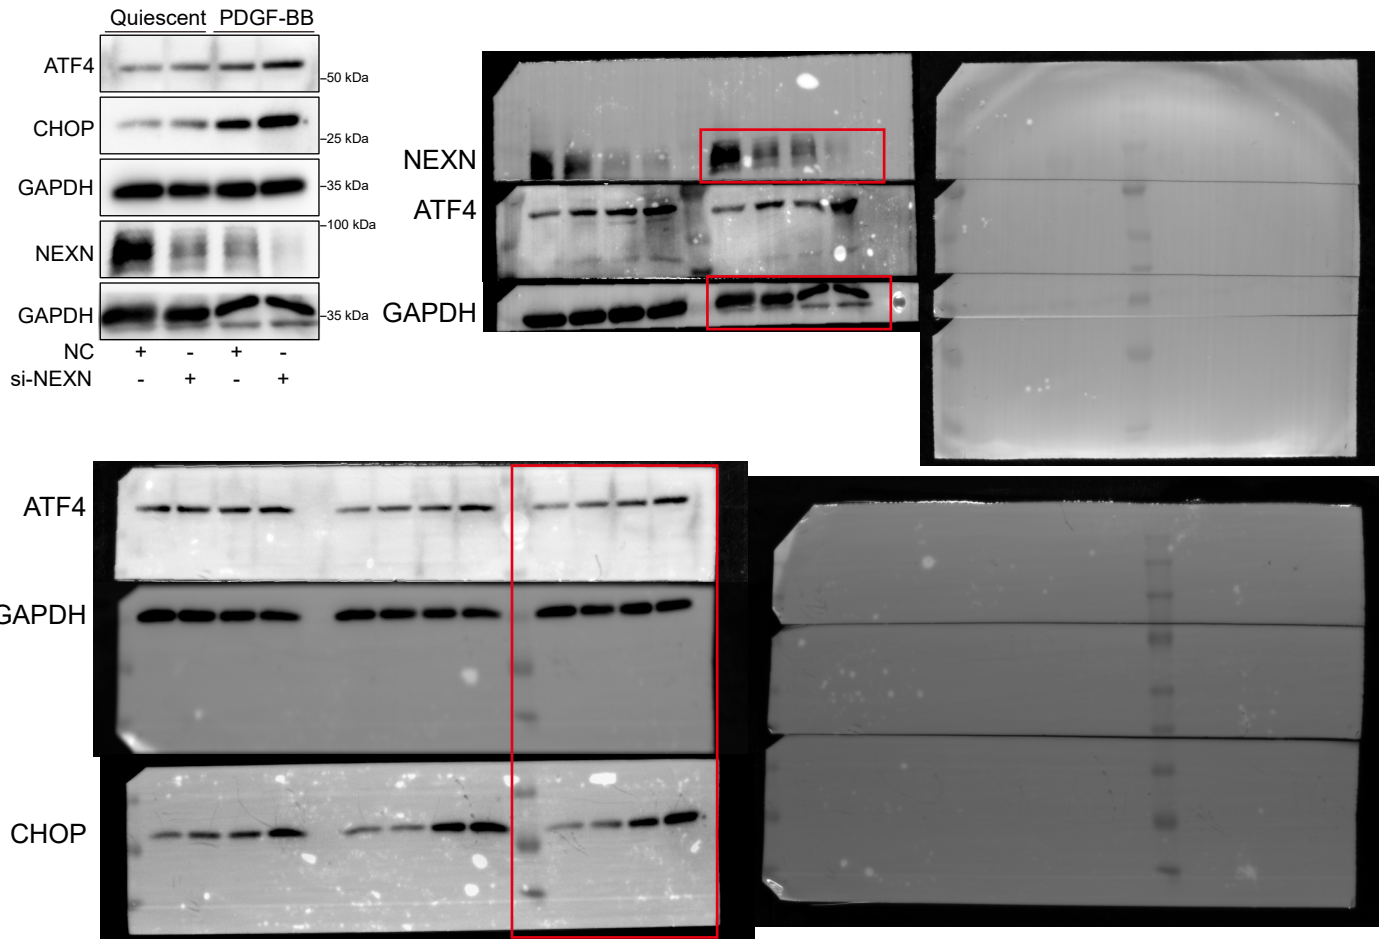

### Full unedited gel for Figure 6F

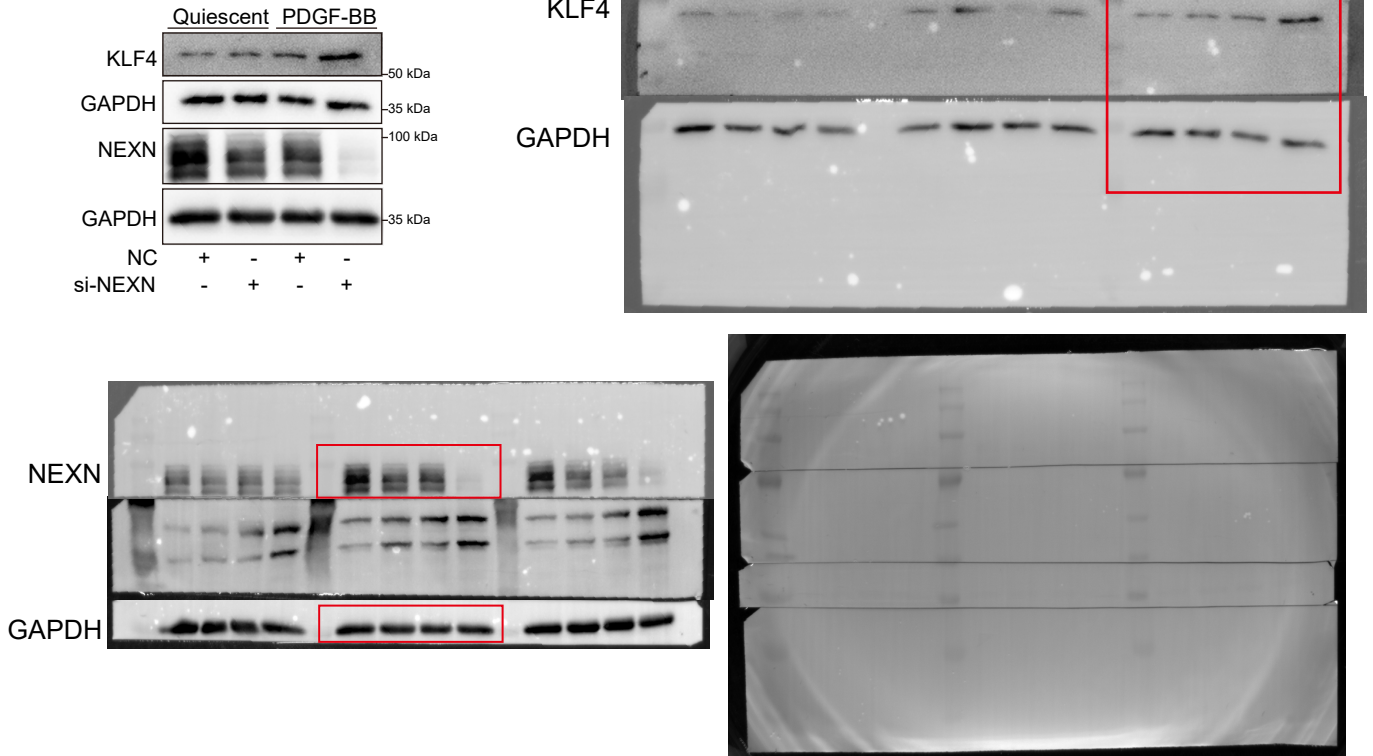

# Full unedited gel for Figure 6G

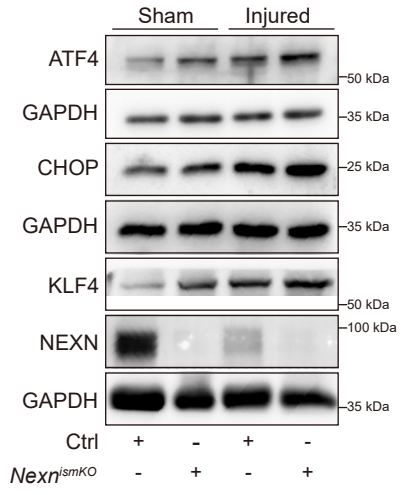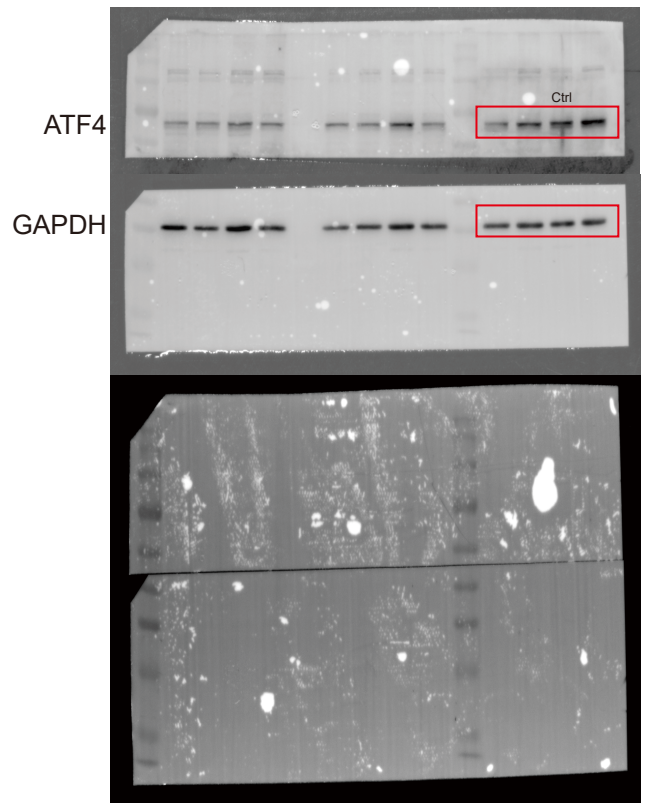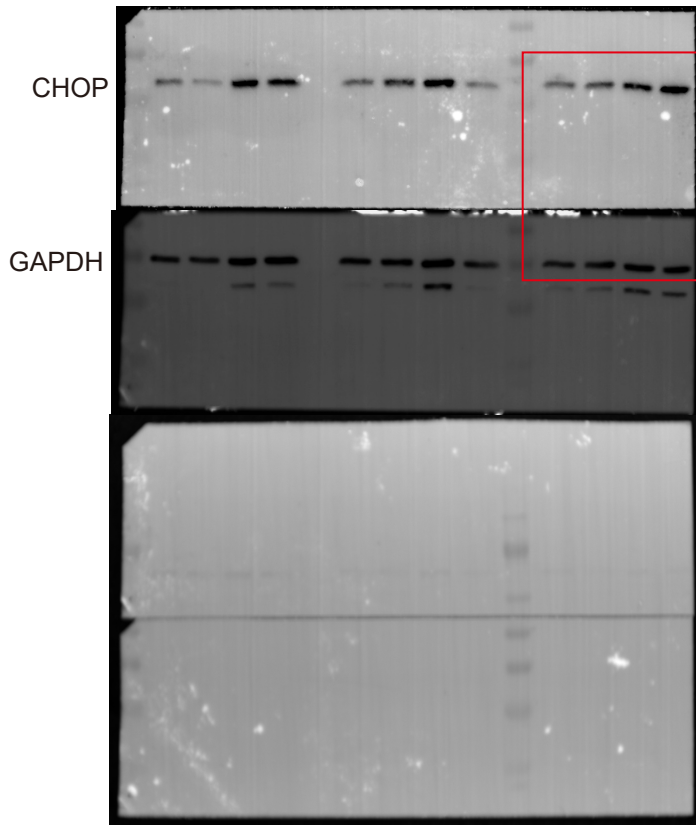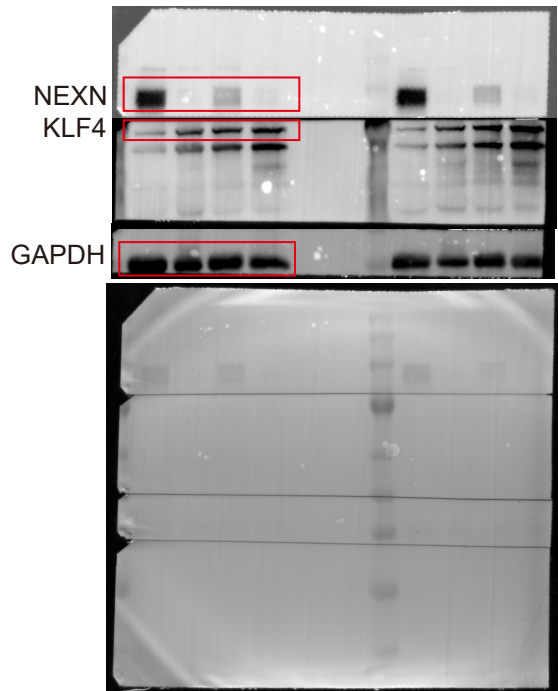

# Full unedited gel for Figure 8A

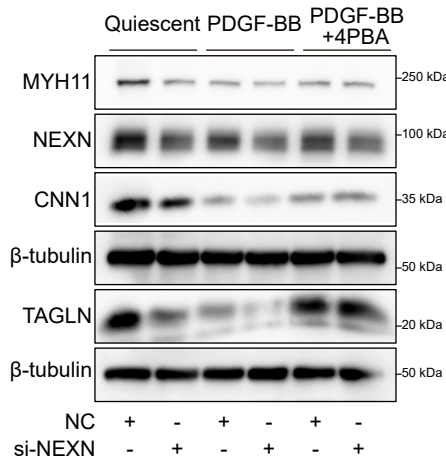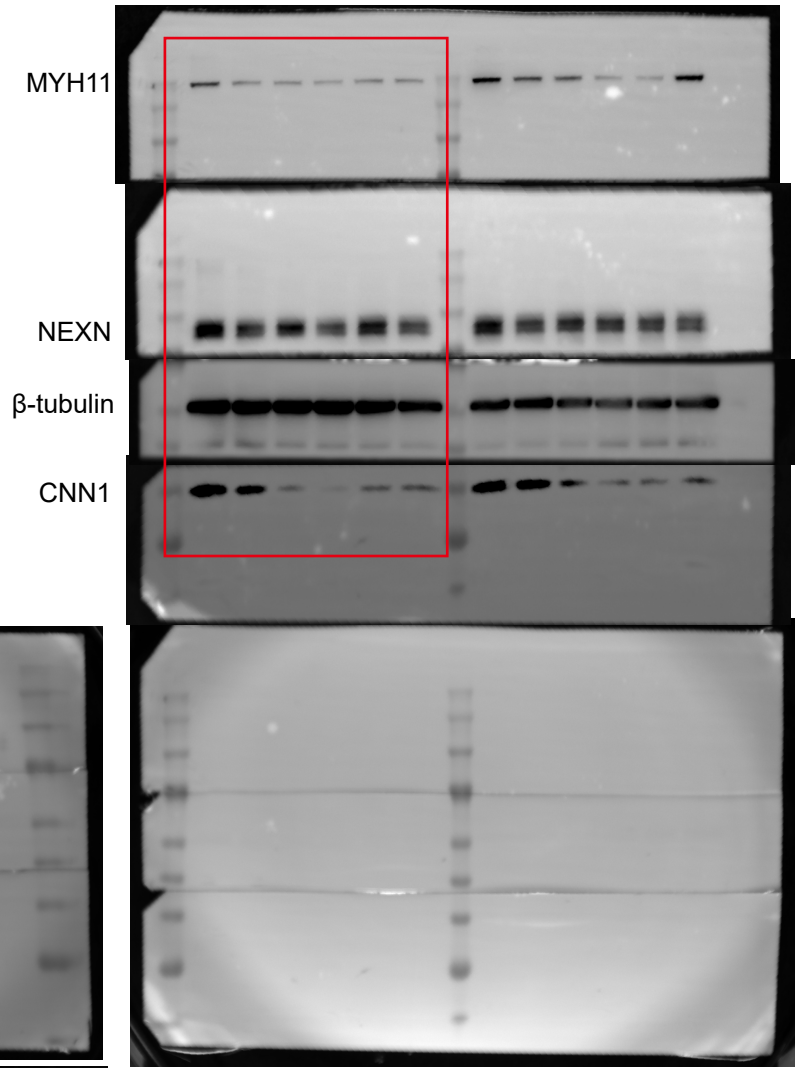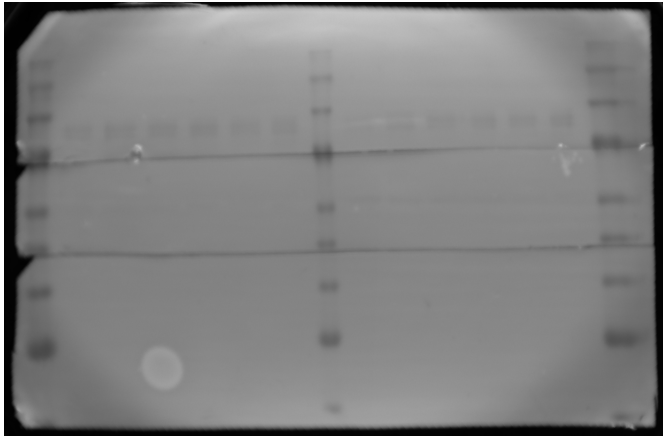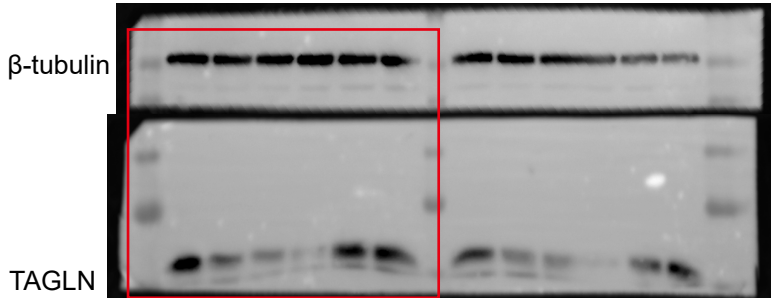

# Full unedited gel for Figure 8G

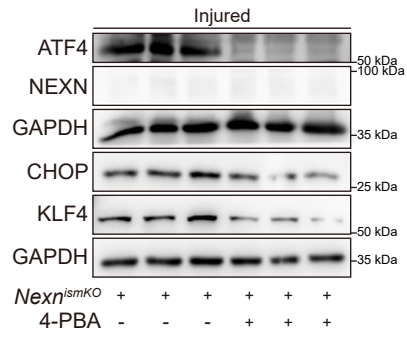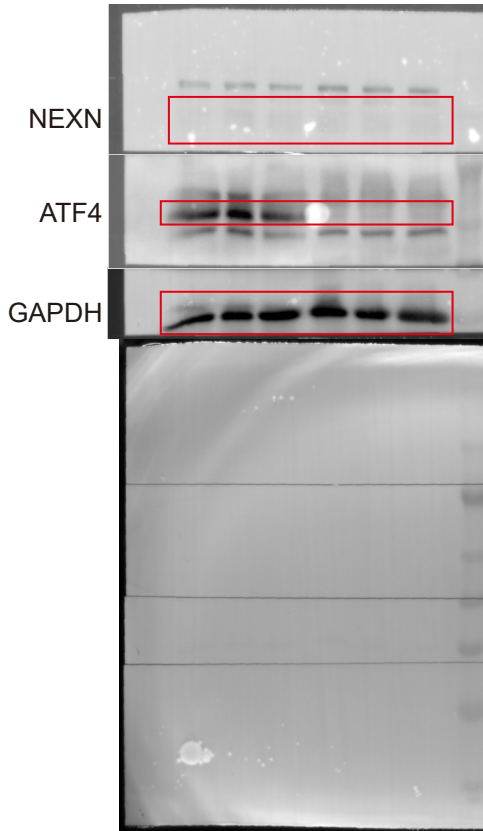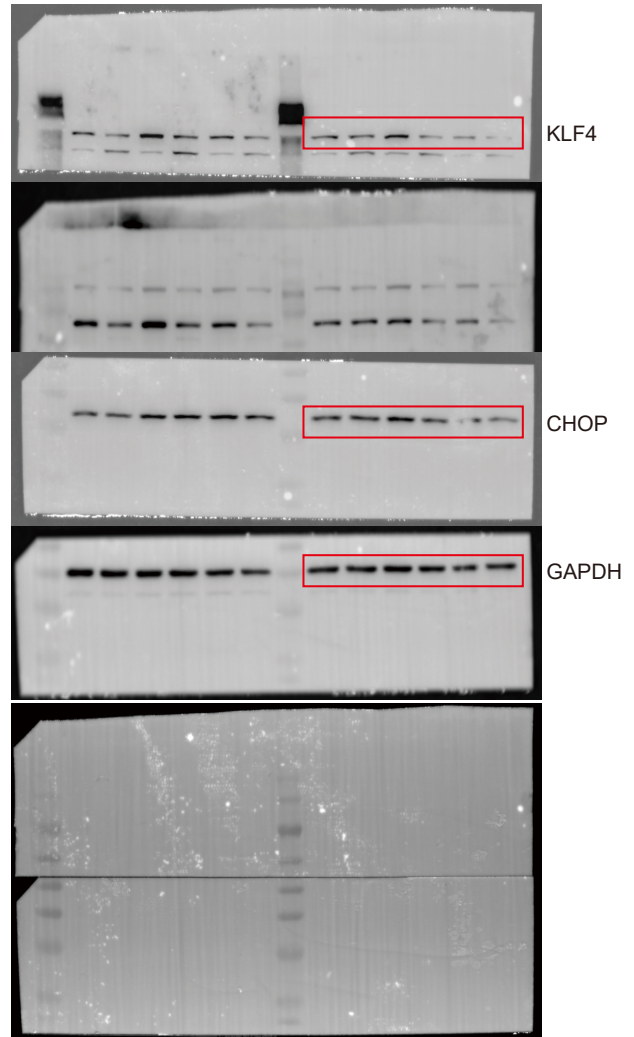

### Full unedited gel for Figure S2

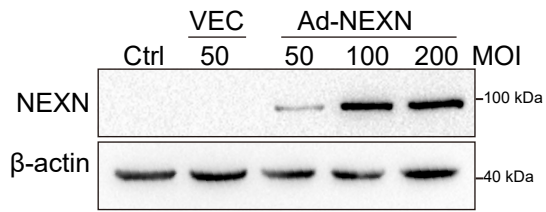

NEXN

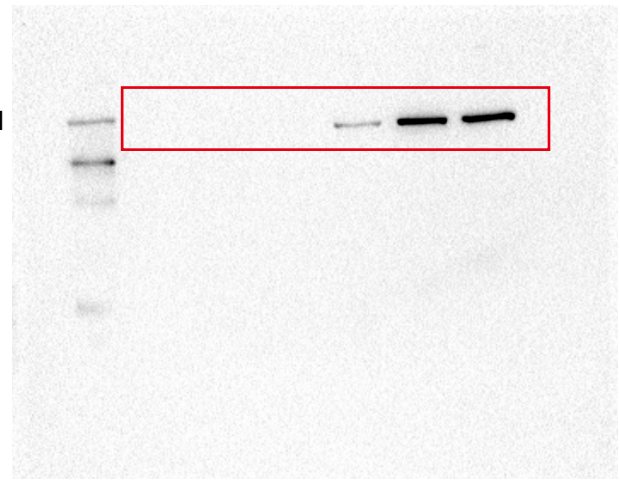

$\beta$ -actin

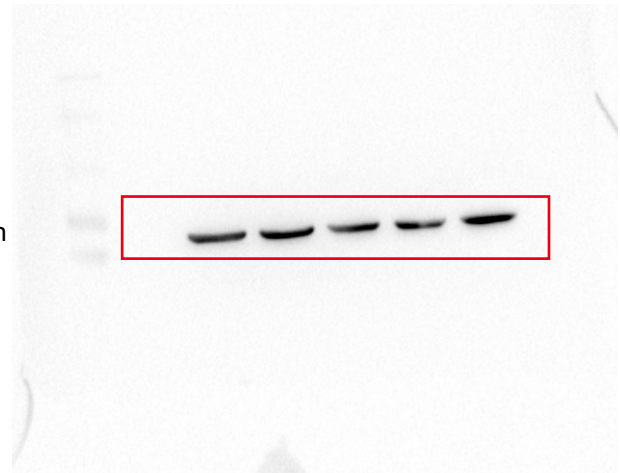

Full unedited gel for Figure S3

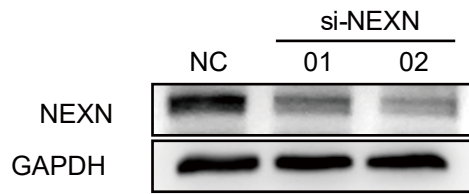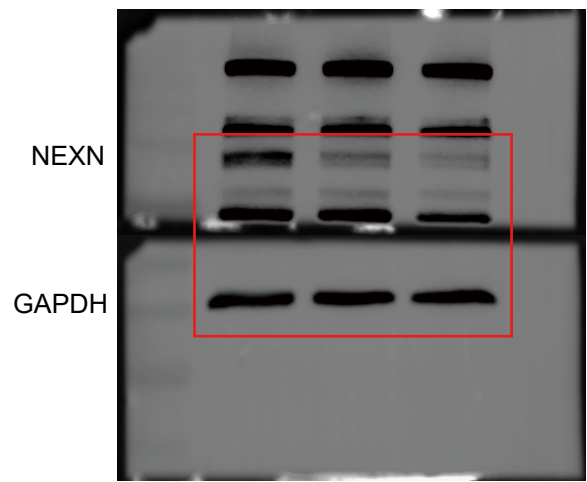

Supplement: sd2 [file 2]
