# Supplementary material for: NEXN regulates vascular smooth muscle cell phenotypic switching and neointimal hyperplasia
Source: JCI journal article supplement (doi:10.1172/jci.insight.190089), 2025-05-29
Supplement: sd1 [file 1]

1 **Supplemental Materials**

2

3 **NEXN regulates vascular smooth muscle cells phenotypic switching**  
4 **and neointimal hyperplasia**

5 Authors:

6 Zexuan Lin<sup>1,2\*</sup>; Chaojie Wang<sup>3\*</sup>; Zhuohua Wen<sup>4\*</sup>; Zhaohui Cai<sup>5</sup>; Wenjie Guo<sup>1,2</sup>; Xin Feng<sup>4</sup>; Zengyan  
7 Huang<sup>6</sup>; Rongjun Zou<sup>3</sup>; Xiaoping Fan<sup>3#</sup>; Canzhao Liu<sup>1,2#</sup>, Hanyan Yang<sup>1,2#</sup>

8

9 **CONTENT**

10 Expanded Materials and Methods

11 Supplemental Tables S1-S6

12 Supplemental Figures S1-S4

13 Supplemental References 1-4

## 14 **Expanded Materials and Methods**

### 15 **scRNA-seq data processing and contractile score calculation**

16 Single-cell RNA sequencing (scRNA-seq) data were obtained from the GEO database  
17 (GSE182232), comprising cells from sham-operated mouse femoral arteries and those  
18 subjected to wire-induced injury for 2 or 4 weeks.(1) Integration, quality control,  
19 interpretation, and clustering of the scRNA-seq data were performed using Seurat  
20 (5.1.0). Cells with fewer than 200 or more than 6,000 detected genes, or with more than  
21 10% mitochondrial counts, were filtered out. Markers used to identify VSMCs clusters  
22 were based on gene signatures provided by the original study.(1) For cells within the  
23 VSMCs clusters, contractile gene signatures-including *ACTA2*, *MYH11*, and *TAGLN*-  
24 were used to calculate contractile scores using the AddModuleScore function in Seurat.

### 25 **Screening candidate genes correlated with contraction score and associated with** 26 **VSMCs phenotypic switching**

27 For each gene expressed in at least 20% of VSMCs, we fitted a linear mixed-effects  
28 model where the output variable was the contraction score and the input was the  
29 normalized and scaled gene expression counts. The beta coefficient for the fixed effect  
30 of each input gene measured gene-specific changes in the contraction score, while  
31 adjusting for housekeeping genes (*ACTB* and *B2M*) and incorporating mouse samples  
32 as a random effect term for robust estimation. We also performed differential expression  
33 analysis to investigate the expression changes of these genes by comparing VSMCs  
34 from injured femoral arteries to those from sham-operated controls. Genes with  
35 adjusted  $P < 0.05$  and meeting the thresholds of beta coefficient  $> 0.20$  and  $\log_2[\text{fold}$   
36  $\text{change (FC)}] < -1$ , or beta coefficient  $< -0.20$  and  $\log_2[\text{FC}] > 1$ , were considered  
37 significantly positively or negatively correlated with contraction scores, respectively.

38 To confirm the expression changes associated with VSMCs phenotypic switching, we

39 compared our significantly positively correlated genes with the upregulated genes in  
40 TGF- $\beta$ -treated rat VSMCs and the significantly negatively correlated genes with the  
41 downregulated genes in PDGF-BB-treated rat VSMCs.(2) Genes with  $|\log_2[\text{FC}]| > 1$   
42 and adjusted  $P < 0.05$  were considered significantly differentially expressed. Linear  
43 mixed-effects models were performed using lme4 (1.1.35.5), contraction scores were  
44 calculated using the AddModuleScore function in Seurat (5.1.0), and differential gene  
45 expression analysis was conducted using DESeq2 (1.44.0).

### 46 **Analysis of NEXN expression along the pseudotime trajectory of VSMCs** 47 **phenotypic switching**

48 We reclustered the analyzed VSMCs from the integrated samples—including sham-  
49 operated controls and 2- or 4-week after wire-induced injury of the mouse femoral  
50 arteries — into three groups: contractile VSMCs, de-differentiated VSMCs, and  
51 synthetic/proliferative VSMCs. These groups were distinguished by their enrichment  
52 in contractile and synthetic VSMCs markers. The extracted VSMCs were converted to  
53 a SingleCellExperiment object using the as.SingleCellExperiment function in  
54 monocle3 (1.3.7). Trajectory inference was performed using Slingshot (2.12.0) with  
55 default settings. After extracting pseudotime values for the VSMCs, NEXN expression  
56 along the pseudotime trajectory was visualized using ggplot2 (3.5.1).

### 57 **siRNA transfection**

58 Small interfering RNA (siRNA) oligonucleotides targeting human NEXN along with a  
59 non-specific scrambled siRNA control were expertly crafted and synthesized by  
60 RiboBio. HASMCs were transfected with siRNAs (25 nM) in vitro using  
61 Lipofectamine 3000 Transfection Reagent (L3000015, Invitrogen) and Opti-MEM™ I  
62 Reduced Serum Medium (31985070, Gibco) according to the manufacturer's protocol.  
63 A comprehensive list of the siRNA sequences can be found in Supplemental Table S3.

64 The VSMCs were transfected with si-NEXN and negative control (NC) siRNA for 24  
65 hours, followed by stimulation with PDGF-BB for 24 hours in medium containing 2%  
66 FBS.

### 67 **Immunofluorescence analysis**

68 Human arterial samples and mouse carotid arteries were rinsed with PBS and fixed  
69 overnight in a 4% PFA solution to preserve tissue integrity. The arteries were then  
70 dehydrated in 10% and 20% sucrose solutions for 30 minutes each, followed by  
71 immersion in a 30% sucrose solution overnight. Afterwards, the dehydrated tissues  
72 were embedded in OCT tissue tek and cut into 7- $\mu$ m thick cryo-sections. VSMCs were  
73 fixed with 4% PFA for 15 minutes to maintain cellular structure. Both the cryo-sections  
74 from human arteries, mouse carotid arteries, and HASMCs were washed with PBS (3  
75  $\times$  5 minutes) and incubated in a blocking solution containing PBS with 5% BSA, 5%  
76 donkey serum, and 0.1% Triton for 1 hour. Primary antibodies were applied overnight,  
77 followed by a 1-hour incubation with secondary antibodies, as previously described.(3)  
78 Nuclei were stained with DAPI (H-1200-10, Vector Laboratories). Primary and  
79 secondary antibodies are listed in Supplemental Table S1. Immunofluorescence images  
80 were acquired using a Leica DMi8 confocal microscope and processed using Fiji  
81 software and Adobe Illustrator 2021.

### 82 **Protein isolation and western blot analysis**

83 Proteins were extracted and subjected to immunoblotting as previously described.(4)  
84 Briefly, cells and tissues were lysed with RIPA buffer (P0013, Beyotime) supplemented  
85 with 1% protease inhibitor (539131, Merck Millipore) kept on ice. The lysates were  
86 then centrifuged at 12,000 rpm for 15 minutes at 4°C to remove debris and obtain a  
87 clear supernatant. Equal quantities of total protein were separated on 10% SDS-PAGE  
88 gels (Epizyme, PG212) and transferred onto a PVDF membrane (Millipore,

89 IPVH00010) for 1.5 hours at 4°C. The membranes were subsequently blocked in TBST  
90 buffer containing 5% skimmed milk powder for 1 hour and then incubated with primary  
91 antibodies at 4°C overnight, followed by incubation with the corresponding HRP-  
92 conjugated secondary antibodies (either anti-rabbit or anti-mouse) for 1 hour at room  
93 temperature. A list of the primary and secondary antibodies used can be found in  
94 Supplemental Table S1. The immunoreactive bands were visualized using an enhanced  
95 chemiluminescence (ECL) detection system (Millipore, WBKLS0100), and the  
96 resulting chemiluminescent signals were captured with an Alliance Q9 imaging system  
97 (Uvitec).

#### 98 **Quantitative real time PCR (qRT-PCR) analysis**

99 Total RNA was isolated from HASMCs using either TRIzol Reagent (Invitrogen,  
100 15596026) or the SevenFast Total RNA Extraction Kit for Cells (SEVEN, SM130-02).  
101 For reverse transcription, 500 ng of total RNA was converted into cDNA using the  
102 PrimeScript™ RT Master Mix (Takara, RR036A). Quantitative RT-PCR was conducted  
103 with TB Green fluorescence dye (Takara, RR820A), following the manufacturer's  
104 guidelines. Each reaction mixture for the real-time PCR contained 2 µL of the reverse  
105 transcription product, 12.5 µL of TB Green, and 0.4 µM of both forward and reverse  
106 primers, with primer sequences detailed in Supplemental Table S4. The PCR  
107 amplification was performed on a Fast 96-Well System (Applied Biosystems),  
108 consisting of 40 cycles with a denaturation step at 95 °C for 5 seconds, annealing at  
109 60 °C for 30 seconds, preceded by an initial denaturation at 95 °C for 30 seconds. Each  
110 sample was analyzed in duplicate, and the RNA was prepared from three separate  
111 experiments to ensure reproducibility.

#### 112 **Cell cycle analysis**

113 To overexpress NEXN, Ad- NEXN or VEC adenovirus was utilized to infect HASMCs

114 for 24 hours. To knock down NEXN, human si-NEXN or NC siRNA was transfected  
115 into HASMCs for 24 hours, followed by stimulation with PDGF-BB for additional 24  
116 hours. Cells were collected and fixed with 70% ethanol, followed by staining with Cell  
117 Cycle and Apoptosis Analysis Kit (Beyotime, C1052) following the manufacturer's  
118 instructions. Flow cytometric analysis was performed using a flow cytometer  
119 (CytoFLEXS, Beckman Coulter), and the data were analyzed using ModFitLT5  
120 Software.

### 121 **5-ethynyl-2'-deoxyuridine (EdU) incorporation assay**

122 Cell proliferation was assessed using the Click-iT™ EdU Cell Proliferation Kit with  
123 Alexa Fluor™ 594 dye (Invitrogen, C10339), following the manufacturer's guidelines.  
124 HASMCs were treated as described in the main text and then exposed to EdU  
125 (Invitrogen, A10044) for 2 hours prior to fixation and permeabilization. The cells were  
126 fixed with 4% PFA for 15 minutes and subsequently permeabilized with a solution  
127 containing 5% BSA, 5% donkey serum, and 0.1% Triton X-100 in PBS for 1 hour at  
128 room temperature. EdU staining was then performed according to the kit's instructions.  
129 Fluorescent images were captured using a Leica DMI8 confocal microscope, and image  
130 processing was conducted using Fiji software and Adobe Illustrator 2021.

### 131 **Scratch wound healing assay**

132 HASMCs were subjected to the treatments detailed in the main text. A scratch wound  
133 assay was performed by creating a scratch in the cell monolayer with a sterile pipette  
134 tip ranging from 10-20  $\mu$ L, and initial photomicrographs were captured using a Leica  
135 microscope. Following stimulation with PDGF-BB, subsequent images were taken at  
136 6, 12, 16, and 24 hours to track VSMCs migration across the wounded area. The  
137 percentage of wound closure was then calculated using Fiji software.

138 **Supplemental Table S1. Antibodies used in this study.**

| <b>Antibody</b>                                          | <b>Applications</b>     | <b>Company</b> | <b>Catalog No.</b> |
|----------------------------------------------------------|-------------------------|----------------|--------------------|
| Anti-Smooth muscle myosin heavy chain 11                 | WB (1:1000), IF (1:100) | Abcam          | ab82541            |
| Anti-Calponin 1 antibody                                 | WB (1:1000)             | Abcam          | ab46794            |
| Anti-Vimentin antibody                                   | IF (1:100)              | Abcam          | ab8978             |
| Anti-Nexilin/F-actin-binding antibody                    | WB (1:1000), IF (1:100) | Abcam          | ab233267           |
| Anti-Hsp90 antibody                                      | WB (1:1000)             | Abcam          | ab203126           |
| Anti-KLF4 antibody                                       | WB (1:1000)             | Abcam          | ab272860           |
| $\alpha$ -Smooth Muscle Actin (1A4) Mouse mAb            | IF (1:100)              | CST            | 48938              |
| Anti-mouse IgG, HRP-linked Antibody                      | WB (1:2000)             | CST            | 7076               |
| Anti-rabbit IgG, HRP-linked Antibody                     | WB (1:2000)             | CST            | 7074               |
| Alexa Fluor® 488-AffiniPure Donkey Anti-Rabbit IgG (H+L) | IF (1:200)              | Jackson        | 711-545-152        |
| Alexa Fluor® 488-AffiniPure Donkey Anti-Mouse IgG (H+L)  | IF (1:200)              | Jackson        | 715-545-150        |
| Alexa Fluor® 594-AffiniPure Donkey Anti-Rabbit IgG (H+L) | IF (1:200)              | Jackson        | 711-585-152        |

|                                                          |                         |                      |             |
|----------------------------------------------------------|-------------------------|----------------------|-------------|
| Alexa Fluor® 594-AffiniPure Donkey Anti-Mouse IgG (H+L)  | IF (1:200)              | Jackson              | 715-585-150 |
| Alexa Fluor® 647-AffiniPure Donkey Anti-Rabbit IgG (H+L) | IF (1:200)              | Jackson              | 711-605-152 |
| Alexa Fluor® 647-AffiniPure Donkey Anti-Mouse IgG (H+L)  | IF (1:200)              | Jackson              | 715-605-150 |
| Nexilin Polyclonal antibody                              | WB (1:1000), IF (1:100) | Proteintech          | 27737-1-AP  |
| Beta Actin Monoclonal antibody                           | WB (1:2000)             | Proteintech          | 66009-1-Ig  |
| GAPDH Monoclonal antibody                                | WB (1:2000)             | Proteintech          | 60004-1-Ig  |
| transgelin/SM22 Polyclonal antibody                      | WB (1:1000)             | Proteintech          | 10493-1-AP  |
| CHOP; GADD153 Monoclonal antibody                        | WB (1:3000)             | Proteintech          | 66741-1-Ig  |
| ATF4 Polyclonal antibody                                 | WB (1:1000)             | Proteintech          | 10835-1-AP  |
| KLF4 Polyclonal antibody                                 | WB (1:1000)             | Proteintech          | 11880-1-AP  |
| β-tubulin (MG7) Mouse Monoclonal Antibody                | WB (1:5000)             | Beijing Ray Antibody | RM2003      |
| Anti-Actin, alpha-Smooth Muscle antibody                 | WB (1:5000)             | Sigma                | A5228       |

139 Abbreviation: **WB**, western blotting; **IF**, immunofluorescence.

140

141 **Supplemental Table S2. Reagents used in this study.**

| <b>Reagent</b>                                      | <b>Applications</b>        | <b>Company</b>        | <b>Catalog No.</b> |
|-----------------------------------------------------|----------------------------|-----------------------|--------------------|
| Human primary aortic smooth muscle cells            | cell                       | Bioscience Inc        | HUM-iCell-c010     |
| Primary smooth muscle cell low serum culture system | cell culture               | Bioscience Inc        | PriMed-iCell-004   |
| Dulbecco's Modified Eagle Medium                    | cell culture               | Biological Industries | 06-1055-571ACS     |
| Fetal bovine serum                                  | cell culture               | Gibco                 | 10099141           |
| Recombinant Human PDGF-BB                           | Growth Factors & Cytokines | PeproTech             | AF-100-14B         |
| Recombinant Human TGF- $\beta$ 1 (HEK293 derived)   | Growth Factors & Cytokines | PeproTech             | 100-21             |
| Lipofectamine 3000 Transfection Reagent             | Transfection               | Invitrogen            | L3000015           |
| Opti-MEM™ I Reduced Serum Medium                    | Transfection               | Gibco                 | 31985070           |
| Antifade Mounting Medium with DAPI                  | IF                         | Vector Laboratories   | H-1200-10          |
| DAPI Staining Solution                              | IF                         | Beyotime              | C1005              |
| Cell lysis buffer for Western and IP                | Protein isolation          | Beyotime              | P0013              |
| Protease Inhibitor Cocktail Set I                   | Protein isolation          | Merck Millipore       | 539131             |
| Pierce™ BCA Protein Assay Kits                      | Protein Assays             | Thermo Scientific     | 23227              |

|                                                  |                                  |                   |            |
|--------------------------------------------------|----------------------------------|-------------------|------------|
| Omni-Easy™One-Step PAGE Gel Fast Preparation Kit | Western blot analysis            | Epizyme           | PG212      |
| PVDF Transfer Membrane                           | Western blot analysis            | Millipore         | IPVH00010  |
| Immobilon Western Chemiluminescent HRP Substrate | Western blot analysis            | Millipore         | WBKLS0100  |
| TRIzol Reagent                                   | RNA Extraction                   | Invitrogen        | 15596026   |
| SevenFast Total RNA Extraction Kit for Cells     | RNA Extraction                   | SEVEN             | SM13002    |
| PrimeScript™ RT Master Mix                       | RNA reverse transcription        | Takara            | RR036A     |
| TB Green® Premix Ex Taq™ II                      | qRT-PCR                          | Takara            | RR820A     |
| DreamTaq Green PCR Master Mix (2X)               | PCR for genotyping               | Thermo Scientific | K1082      |
| Fixed Core Wire Guides                           | Carotid artery wire injury model | Cook Medical      | C-SF-15-15 |
| Collagen Fiber and Elastic Fiber Staining Kit    | Morphometric Analysis            | Solarbio          | G1597      |
| Hematoxylin-Eosin (HE) Stain Kit                 | Morphometric Analysis            | Solarbio          | G1120      |
| Cell Cycle and Apoptosis Analysis Kit            | Cell cycle analysis              | Beyotime          | C1052      |
| EdU (5-ethynyl-2'-deoxyuridine)                  | Cell Proliferation               | Invitrogen        | A10044     |
| Click-iT® EdU Imaging Kits                       | Cell Proliferation               | Invitrogen        | C10339     |

**Supplemental Table S3. siRNA Sequences Targeting on human Genes**

| Product number     | Gene          | Target sequence     |
|--------------------|---------------|---------------------|
| stB0014693B (work) | st-h-NEXN_001 | GGAGATGATTCACACTTA  |
| stB0014693C (work) | st-h-NEXN_002 | CCAGTCAGATTTACGGTTA |

**Supplemental Table S4. The primers used for qRT-PCR analysis**

| Gene         | Homo sapiens            |
|--------------|-------------------------|
|              | Primers (5'-3')         |
| <i>ACTA2</i> | GCCAAGCACTGTCAGGAATC    |
|              | AAAACAGCCCTGGGAGCATC    |
| <i>TAGLN</i> | GGAAACCCACCCTCTCAGTC    |
|              | TGCACTAGCCAAGTCATCCG    |
| <i>CNN1</i>  | GAGGCAAATAGCTGGGGTCC    |
|              | CCATCTTTGAGGCCGTCCAT    |
| <i>NEXN</i>  | ATGGCTCCACTGCTGAAGAT    |
|              | TTCTGGTTTGGGTTCTCCTG    |
| <i>GAPDH</i> | GGAGCGAGATCCCTCCAAAAT   |
|              | GGCTGTTGTCATACTTCTCATGG |

**Supplemental Table S5. The primers used for mice genotyping**

| Gene                             | Primers (5'-3')           |
|----------------------------------|---------------------------|
| <i>Nexn<sup>fl/fl</sup></i>      | TCAAAGGGAAGGTCATTAATAATTC |
|                                  | TGATGATGATGATGTTGCTAAGTG  |
| <i>Myh11-Cre/ER<sup>T2</sup></i> | ATATAAGCCCAACTGCAGGAAA    |

GTCAAAGTCAGTGCGTTCAAAG

Tomato-F CTGTTTCCTGTACGGCATGG

Tomato-R GGCATTAAGCAGCGTATCC

*Rosa26*-tdTomato

Rosa-WT-F AAGGGAGCTGCAGTGGAGTA

Rosa-WT-R CCGAAAATCTGTGGGAAGTC

## Supplemental Figures

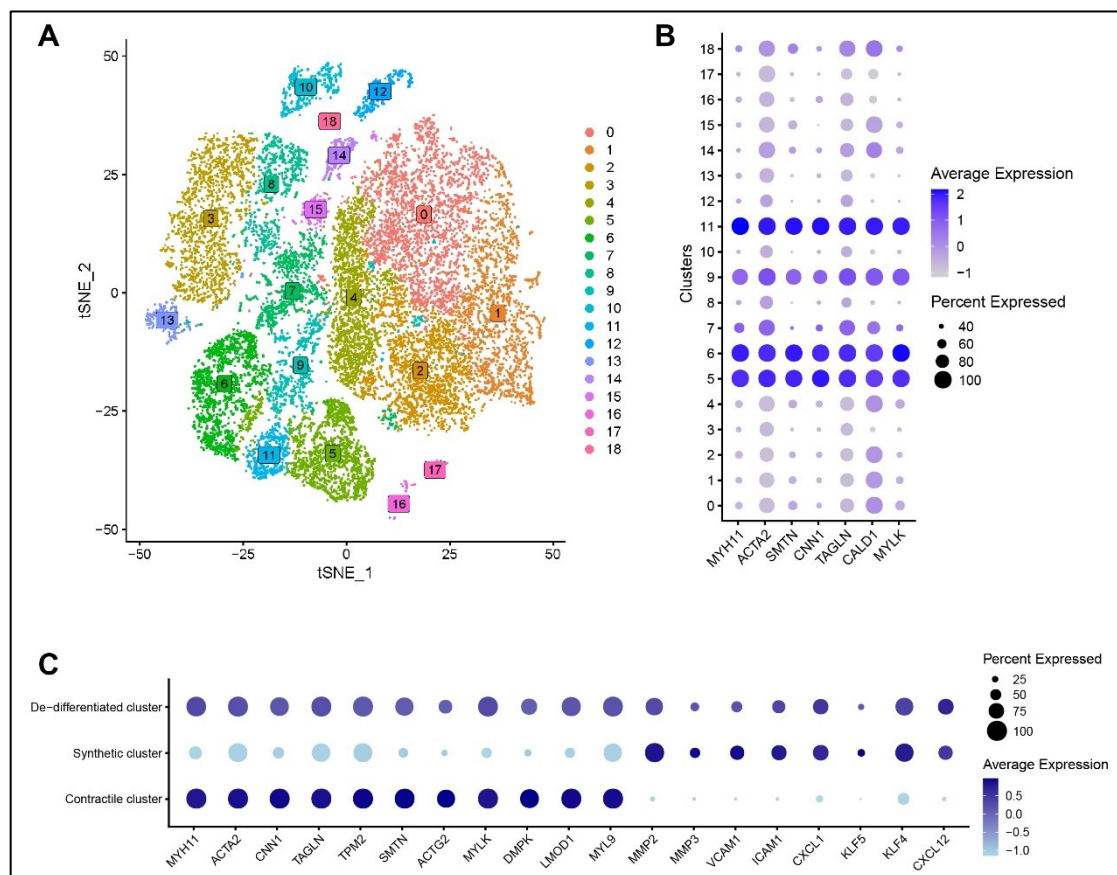

**Figure S1. Identification of VSMCs clusters from single-cell transcriptomic data of mouse femoral arteries integrating sham-operated controls and 2- and 4- week post-injury samples (GSE182232).**

**A**, t-SNE (t-distributed stochastic neighbor embedding) plot displaying the unsupervised clustering of 24,962 cells isolated from femoral arteries at all time points (sham-operated controls and 2 or 4 weeks after wire-induced injury). **B**, Expression of

VSMCs markers across 19 cell clusters. Clusters 5, 6, 9, and 11 were identified as VSMCs based on specific enrichment of classical contractile genes. **C**, Expression of contractile and synthetic VSMCs markers for the reclustered VSMCs extracted from **B**, showing three distinct groups: contractile VSMCs, de-differentiated VSMCs, and synthetic/proliferative VSMCs.

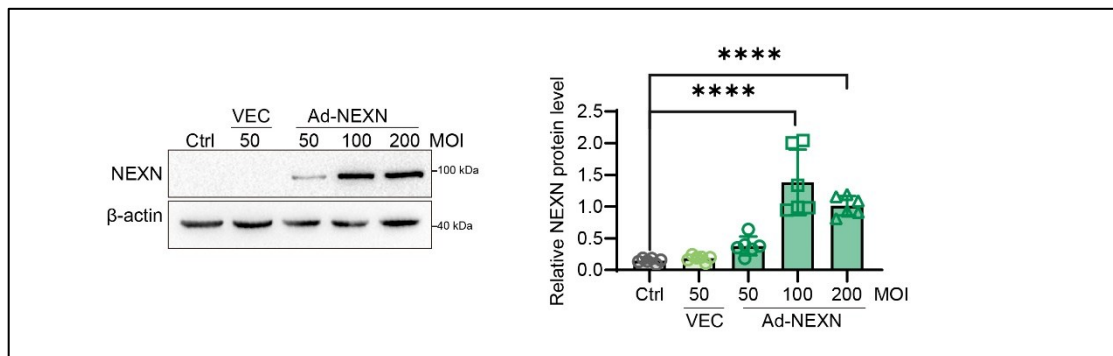

**Figure S2. The overexpression efficiency of NEXN adenovirus was confirmed in vascular smooth muscle cells.**

Representative Western blot (Left) and quantification (Right) of NEXN protein levels in HASMCs infected with VEC (50 moi) or NEXN adenovirus at 50, 100 and 200 moi respectively for 48 hours.  $\beta$ -actin was used as an internal control.  $n=6$  for each group. Data are represented as mean  $\pm$  SEM. Statistical analyses were performed using one-way analysis of variance. \*\*\*\* $P < 0.0001$  for indicated comparisons.

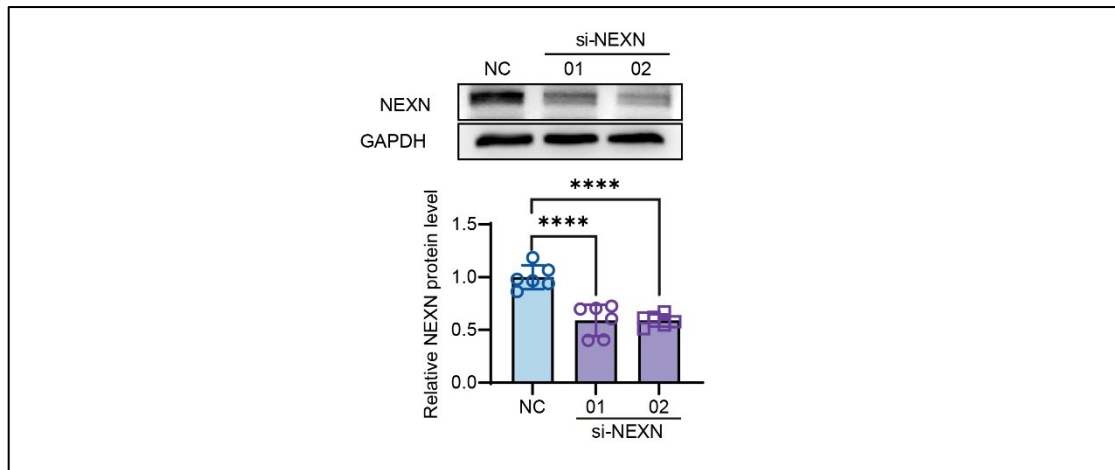

**Figure S3. The knock-out efficacy of NEXN interference was validated in vascular smooth muscle cells.**

Representative Western blot (Upper) and quantification (Lower) of NEXN protein levels in HASMCs transfected with scramble siRNA or NEXN single siRNAs (si-NEXN 01, 02) at 25 nM respectively for 48 hours. GAPDH was used as an internal control. n=6 for each group. Data are represented as mean  $\pm$  SEM. Statistical analyses were performed using one-way analysis of variance. \*\*\*\*P < 0.0001 for indicated comparisons.

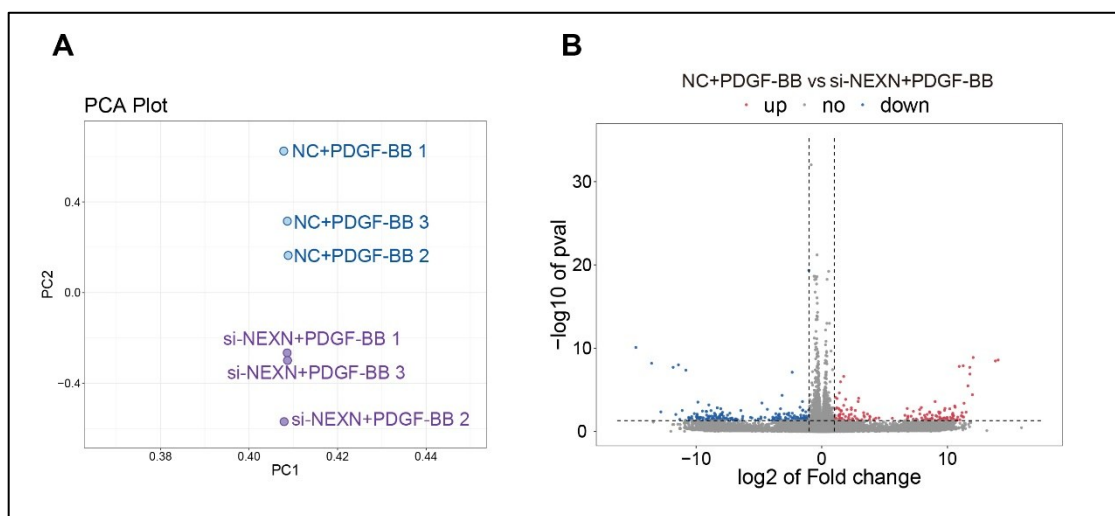

**Figure S4. RNA-sequence analysis of gene expression from NC or si-NEXN pre-transfected HASMCs treated with PDGF-BB.**

**A**, Principal component analysis (PCA) of RNA-seq data. NC+PDGF-BB and si-NEXN+PDGF-BB samples are labeled in blue and purple, respectively. **B**, Volcano plot of differentially expressed genes between NC+PDGF-BB and si-NEXN+PDGF-BB HASMCs, as revealed by RNA-seq.

## References

1. Jiang L, et al. Nonbone marrow CD34(+) cells are crucial for endothelial repair of injured artery. *Circ Res.* 2021;129(8):e146-e165.
2. Jia Y, et al. PHB2 maintains the contractile phenotype of VSMCs by counteracting PKM2 splicing. *Circ Res.* 2022;131(10):807-824.
3. Liu C, et al. Nexilin is a new component of junctional membrane complexes required for cardiac T-Tubule formation. *Circulation.* 2019;140(1):55-66.
4. Yang HY, et al. Platelet CFTR inhibition enhances arterial thrombosis via increasing intracellular Cl(-) concentration and activation of SGK1 signaling pathway. *Acta Pharmacol Sin.* 2022;43(10):2596-2608.
